# Supplementary material for: Differential expression of Lutheran/BCAM regulates biliary tissue remodeling in ductular reaction during liver regeneration
Source: eLife journal article supplement (doi:10.7554/elife.36572), 2018-07-30
Supplement: supp [file elife-36572-supp-v1.zip]

Archive with 19 entries (19 files):
- elife_poa_e36572_Figure_1_figure_supplement_4.pdf
- elife_poa_e36572_Figure_5_figure_supplement_4.pdf
- elife_poa_e36572_Figure_5_figure_supplement_3.pdf
- elife_poa_e36572_Figure_2_figure_supplement_2.pdf
- elife_poa_e36572_Figure_2_figure_supplement_1.pdf
- elife_poa_e36572_Figure_6_figure_supplement_1.pdf
- elife_poa_e36572_Figure_1_figure_supplement_1.pdf
- elife_poa_e36572_Figure_1_figure_supplement_2.pdf
- elife_poa_e36572_Figure_5_figure_supplement_1.pdf
- elife_poa_e36572_Figure_6_source_data_1.xlsx
- elife_poa_e36572_Figure_4_source_data_1.xlsx
- elife_poa_e36572_Figure_5_figure_supplement_2.pdf
- elife_poa_e36572_Figure_1_figure_supplement_3.pdf
- elife_poa_e36572_Figure_3_source_data_1.xlsx
- elife_poa_e36572_Transparent_Reporting_File.docx
- elife_poa_e36572_Figure_5_figure_supplement_2_source_data_1.xlsx
- elife_poa_e36572_Figure_5_figure_supplement_4_source_data_1.xlsx
- elife_poa_e36572_Figure_5_figure_supplement_3_source_data_1.xlsx
- elife_poa_e36572_Figure_5_source_data_1.xlsx
