# Supplementary material for: Differential expression of Lutheran/BCAM regulates biliary tissue remodeling in ductular reaction during liver regeneration
Source: eLife journal article supplement (doi:10.7554/elife.36572), 2018-07-30
Supplement: supp [file elife-36572-supp-v1.zip › elife_poa_e36572_Figure_3_source_data_1.xlsx]

## Sheet: Figure 3A
Numerical data for Figure 3A															Mann-Whitney test for Figure 3A
	D0→D1	Average	Average	Rel.Ave	OS-Ftest										Table Analyzed	NP
Lu- BC						Abs.	StdDev		Lu- BC	Rel.	StdDev
	90.4033	70.5556	55.1933	1	0.0726461	70.5556	27.0059			1.27833	0.489297				Column B	Lu+ BC
	101.178					82.4883				1.49453					vs.	vs.
	20.085					46.0533				0.8344					Column A	Lu- BC
	113.828	82.4883				21.6761				0.392731
	100.732														Mann Whitney test
	32.905														P value	0.0286
	116.748	46.0533													Exact or approximate P value?	Exact
	19.6033														P value summary	*
	1.80833														Significantly different (P < 0.05)?	Yes
	39.0817	21.6761													One- or two-tailed P value?	Two-tailed
	-2.11667														Sum of ranks in column A,B	10 , 26
	28.0633														Mann-Whitney U	0
Lu+ BC							StdDev		Lu+ BC	Rel.	StdDev				Difference between medians
	153.92	138.933	153.632	2.78353		138.933	10.2349			2.5172	0.185437				Median of column A	1.056, n=4
	125.505					157.017				2.84486					Median of column B	2.835, n=4
	137.373					162.659				2.94708					Difference: Actual	1.779
	160.848	157.017				155.921				2.82499					Difference: Hodges-Lehmann	1.676
	152.903
	157.3
	159.127	162.659
	170.072
	158.78
	140.507	155.921
	132.783
	194.472
				Rel.	Mean Distance	StdDev
				Lu- BC	1	0.489297
				Lu+ BC	2.78353	0.185437

## Sheet: Figure 3C
Lu- BC					Lu+ BC				100μm＝49.7 pixel			Lu- BC	(count)				Lu+ BC	(count)
Sample#	Count#	Lumen diameter	pix→μm		Sample#	Count#	Lumen diameter	pix→μm			Sample#	Cell aggregate	1 - 10 μm Lumen	> 10 μm Lumen		Sample#	Cell aggregate	1 - 10 μm Lumen	> 10 μm Lumen
1	1	7.6	15.2918		1	1	0	0			1	3	2	7		1	16	0	0
	2	5	10.0604			2	0	0			2	3	3	5		2	13	0	0
	3	5.1	10.2616			3	0	0			3	4	1	8		3	11	1	0
	4	4.9	9.85915			4	0	0			4	5	1	8		4	11	1	0
	5	5.9	11.8712			5	0	0
	6	0	0			6	0	0				Lu- BC	(%)				Lu+ BC	(%)
	7	5.9	11.8712			7	0	0			Sample#	Cell aggregate	1 - 10 μm Lumen	> 10 μm Lumen		Sample#	Cell aggregate	1 - 10 μm Lumen	> 10 μm Lumen
	8	0	0			8	0	0			1	25	16.6667	58.3333		1	100	0	0
	9	0	0			9	0	0			2	27.2727	27.2727	45.4545		2	100	0	0
	10	5.1	10.2616			10	0	0			3	30.7692	7.69231	61.5385		3	91.6667	8.33333	0
	11	4.7	9.45674			11	0	0			4	35.7143	7.14286	57.1429		4	91.6667	8.33333	0
	12	5.1	10.2616			12	0	0
	13					13	0	0			average%	29.6891	14.6936	55.6173			95.8333	4.16667	0
							0	0			StDEV	4.66534	9.45444	7.02486			4.81125	4.81125	0
							0	0
							0	0
Sample#	Count#	Lumen diameter	pix→μm		Sample#	Count#	Lumen diameter	pix→μm				Cell aggregate	1 - 10 μm Lumen	> 10 μm Lumen		ttest	Cell aggregate	1 - 10 μm Lumen	> 10 μm Lumen
2	1	0	0		2	1	0	0			Lu- BC	29.6891	14.6936	55.6173			1.09617e-06	0.0944095	4.02459e-06
	2	3.1	6.23742			2	0	0			Lu+ BC	95.8333	4.16667	0
	3	10.2	20.5231			3	0	0
	4	7.7	15.493			4	0	0
	5	0	0			5	0	0
	6	3.1	6.23742			6	0	0
	7	6.5	13.0785			7	0	0
	8	4.7	9.45674			8	0	0
	9	6.7	13.4809			9	0	0
	10	0	0			10	0	0
	11	12.7	25.5533			11	0	0
	12					12	0	0
	13					13	0	0
Sample#	Count#	Lumen diameter	pix→μm		Sample#	Count#	Lumen diameter	pix→μm
3	1	11.4	22.9376		3	1	0	0
	2	5.1	10.2616			2	0	0
	3	0	0			3	0	0
	4	6.3	12.6761			4	0	0
	5	7	14.0845			5	0	0					F
	6	5.4	10.8652			6	0	0
	7	7.5	15.0905			7	0	0
	8	0	0			8	3.9	7.84708
	9	0	0			9	0	0
	10	0	0			10	0	0
	11	4.3	8.65191			11	0	0
	12	6.6	13.2797			12	0	0
	13	8.1	16.2978			13
Sample#	Count#	Lumen diameter	pix→μm		Sample#	Count#	Lumen diameter	pix→μm
4	1	0	0		4	1	0	0
	2	7.2	14.4869			2	0	0
	3	5.9	11.8712			3	0	0
	4	9.8	19.7183			4	0	0
	5	0	0			5	0	0
	6	5.4	10.8652			6	3.9	7.84708
	7	0	0			7	0	0
	8	4.3	8.65191			8	0	0
	9	6.1	12.2736			9	0	0
	10	5.5	11.0664			10	0	0
	11	0	0			11	0	0
	12	5.6	11.2676			12	0	0
	13	5.2	10.4628			13
	14	0	0			14
