# Supplementary material for: Differential expression of Lutheran/BCAM regulates biliary tissue remodeling in ductular reaction during liver regeneration
Source: eLife journal article supplement (doi:10.7554/elife.36572), 2018-07-30
Supplement: supp [file elife-36572-supp-v1.zip › elife_poa_e36572_Figure_4_source_data_1.xlsx]

## Sheet: Figure 4B
Numerical data for Figure 4B																	Mann-Whitney test for Figure 4B
200μm =	27.4	100μm =	13.6														Table Analyzed	LuOE
1μm =	0.137	1μm =	0.136		Mean1μm	0.1365
																	Column B	CELN-mLu
Day0→Day1																	vs.	vs.
Lu- BC-GFP			Abs.	Rel.	Abs.	Rel.											Column A	CELN-GFP
Moved Pixel	Moved Distance		Mean of Each Wells		Mean Distance		StdDev	StdErr		Abs.	Mean Distance	StdDev	StdErr
13.9625	102.289		66.9643	0.929398	72.0513	1	11.055	4.94394		Lu- BC-GFP	72.0513	11.055	4.94394				Mann Whitney test
12.1875	89.2857									Lu- BC-mLu	373.013	24.2556	10.8474				P value	0.0079
10.125	74.1758																Exact or approximate P value?	Exact
0.2875	2.10623																P value summary	**
																	Significantly different (P < 0.05)?	Yes
7.95	58.2418		72.9167	1.01201													One- or two-tailed P value?	Two-tailed
4.2875	31.4103																Sum of ranks in column A,B	15 , 40
8.225	60.2564																Mann-Whitney U	0
19.35	141.758
																	Difference between medians
17.925	131.319		87.4084	1.21314													Median of column A	1.012, n=5
4.45	32.6007																Median of column B	5.121, n=5
22.225	162.821																Difference: Actual	4.109
3.125	22.8938																Difference: Hodges-Lehmann	4.109
19.8875	145.696		57.4176	0.796899
5.175	37.9121									Rel.	Mean Distance	StdDev	StdErr
-6.525	-47.8022									Lu- BC-GFP	1	0.153432	0.0686169
12.8125	93.8645									Lu- BC-mLu	5.17705	0.336644	0.150552
14.275	104.579		75.5495	1.04855
1.475	10.8059
8.775	64.2857
16.725	122.527
			Abs.	Rel.	Abs.	Rel.
Lu- BC-mLu			Mean of Each Wells		Mean Distance		StdDev	StdErr
43.125	315.934		350.801	4.86877	373.013	5.17705	24.2556	10.8474
48.2875	353.755
49.175	360.256
50.95	373.26
54.225	397.253		411.836	5.71587
45.3	331.868
82.7	605.861									Abs.			Rel.
42.6375	312.363									Lu- BC-GFP	Lu- BC-mLu		Lu- BC-GFP	Lu- BC-mLu
										66.9643	350.801		0.929398	4.86877
51.3625	376.282		378.068	5.2472						72.9167	411.836		1.01201	5.71587
52.55	384.982									87.4084	378.068		1.21314	5.2472
51.3625	376.282									57.4176	355.38		0.796899	4.93232
51.15	374.725									75.5495	368.979		1.04855	5.12106
47.8125	350.275		355.38	4.93232
53.675	393.223
47.8	350.183
44.75	327.839
46.95	343.956		368.979	5.12106
54.5875	399.908
50.125	367.216
49.8	364.835

## Sheet: Figure 4C
Lu－ BC -GFP					Lu－ BC -mLu				100μm＝49.7 pixel			Lu－ BC -GFP	(count)				Lu－ BC -mLu	(count)
Sample#	Count#	Lumen diameter	pix→μm		Sample#	Count#	Lumen diameter	pix→μm			Sample#	Cell aggregate	1 - 10 μm Lumen	> 10 μm Lumen		Sample#	Cell aggregate	1 - 10 μm Lumen	> 10 μm Lumen
1	1	5.8	11.67		1	1	0	0			1	4	0	10		1	14	0	0
	2	15.7	31.5895			2	0	0			2	5	4	7		2	12	2	0
	3	13.2	26.5594			3	0	0			3	9	2	6		3	11	2	0
	4	15.6	31.3883			4	0	0			4	6	3	3		4	10	2	1
	5	0	0			5	0	0
	6	16.9	34.004			6	0	0				Lu－ BC -GFP	(%)				Lu－ BC -mLu	(%)
	7	6.7	13.4809			7	0	0			Sample#	Cell aggregate	1 - 10 μm Lumen	> 10 μm Lumen		Sample#	Cell aggregate	1 - 10 μm Lumen	> 10 μm Lumen
	8	5.7	11.4688			8	0	0			1	28.5714	0	71.4286		1	100	0	0
	9	10.1	20.3219			9	0	0			2	31.25	25	43.75		2	85.7143	14.2857	0
	10	0	0			10	0	0			3	52.9412	11.7647	35.2941		3	84.6154	15.3846	0
	11	0	0			11	0	0			4	50	25	25		4	76.9231	15.3846	7.69231
	12	18.6	37.4245			12	0	0
	13	0	0			13	0	0			average%	40.6907	15.4412	43.8682			86.8132	11.2637	1.92308
	14	17	34.2052			14	0	0			StDEV	12.5531	12.0373	19.9091			9.62192	7.527	3.84615
Sample#	Count#	Lumen diameter	pix→μm		Sample#	Count#	Lumen diameter	pix→μm				Cell aggregate	1 - 10 μm Lumen	> 10 μm Lumen		ttest	Cell aggregate	1 - 10 μm Lumen	> 10 μm Lumen
2	1	10.2	20.5231		2	1	0	0			Lu－ BC -GFP	40.6907	15.4412	43.8682			0.00111873	0.577662	0.00609785
	2	18.3	36.8209			2	3.1	6.23742			Lu－ BC -mLu	86.8132	11.2637	1.92308
	3	4.9	9.85915			3	0	0
	4	0	0			4	0	0
	5	3.5	7.04225			5	0	0
	6	21.2	42.6559			6	0	0
	7	4.7	9.45674			7	0	0
	8	13.5	27.163			8	0	0
	9	0	0			9	0	0
	10	10	20.1207			10	0	0
	11	13	26.1569			11	0	0
	12	3.7	7.44467			12	0	0
	13	0	0			13	0	0
	14	18.4	37.0221			14	3.1	6.23742
	15	0	0
	16	0	0
Sample#	Count#	Lumen diameter	pix→μm		Sample#	Count#	Lumen diameter	pix→μm
3	1	4.1	8.2495		3	1	0	0
	2	16.5	33.1992			2	2.3	4.62777
	3	0	0			3	0	0
	4	0	0			4	0	0
	5	4.6	9.25553			5	0	0
	6	12.3	24.7485			6	0	0
	7	8.7	17.505			7	0	0
	8	0	0			8	3.3	6.63984
	9	0	0			9	0	0
	10	19.1	38.4306			10	0	0
	11	0	0			11	0	0
	12	13.9	27.9678			12	0	0
	13	0	0			13	0	0
	14	19.9	40.0402
	15	0	0
	16	0	0
	17	0	0
Sample#	Count#	Lumen diameter	pix→μm		Sample#	Count#	Lumen diameter	pix→μm
4	1	11.7	23.5412		4	1	4.4	8.85312
	2	3	6.03622			2	0	0
	3	9.8	19.7183			3	0	0
	4	0	0			4	0	0
	5	12.7	25.5533			5	0	0
	6	0	0			6	0	0
	7	0	0			7	0	0
	8	0	0			8	0	0
	9	4.2	8.4507			9	4.1	8.2495
	10	0	0			10	0	0
	11	0	0			11	19.2	38.6318
	12	2.5	5.03018			12	0	0
						13	0	0
