# Supplementary material for: Differential expression of Lutheran/BCAM regulates biliary tissue remodeling in ductular reaction during liver regeneration
Source: eLife journal article supplement (doi:10.7554/elife.36572), 2018-07-30
Supplement: supp [file elife-36572-supp-v1.zip › elife_poa_e36572_Figure_5_figure_supplement_1.pdf]

# Figure 5-figure supplement 1

## DDC Injury

Downregulation of Lutheran

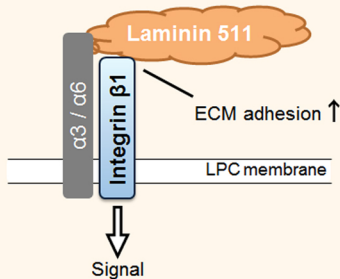

Duct formation  $\uparrow$

Motility  $\downarrow$

## CDE Injury

Upregulation of Lutheran

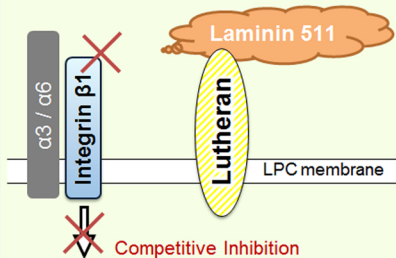

Duct formation  $\downarrow$

Motility  $\uparrow$
