# Supplementary material for: Differential expression of Lutheran/BCAM regulates biliary tissue remodeling in ductular reaction during liver regeneration
Source: eLife journal article supplement (doi:10.7554/elife.36572), 2018-07-30
Supplement: supp [file elife-36572-supp-v1.zip › elife_poa_e36572_Figure_5_figure_supplement_2_source_data_1.xlsx]

## Sheet: Figure 5-supplement 2
	Numerical Data (real-time RT-PCR)											Summary of expression analyses										Mann Whitney test
	Experiment: 180616 Active filters: FAM (483-533), HEX / Yellow555 (523-568)
	Chart	Pairing	Sample Name	Targets	References	Mean Cp	Mean Cp	Target/Ref	Normalized	Status			ITGB1			ITGA3			ITGA6			Table Analyzed	ITGB1
	TRUE	A3/A1	CELN-1	mITGB1	ActB	22.6092	20.8876	0.3032					Lu- BC	Lu+ BC		Lu- BC	Lu+ BC		Lu- BC	Lu+ BC
	TRUE	B3/B1	CELN-2	mITGB1	ActB	22.6245	20.7832	0.2791					0.3032	0.2716		0.4393	0.4592		0.1572	0.1435		Column B	Lu+BC
	TRUE	C3/C1	CELN-3	mITGB1	ActB	22.5547	20.9029	0.3182					0.2791	0.2601		0.4255	0.4602		0.1475	0.1322		vs.	vs.
	TRUE	D3/D1	CELN-4	mITGB1	ActB	22.6074	20.7907	0.2839					0.3182	0.2598		0.4634	0.469		0.1635	0.1443		Column A	Lu-BC
	TRUE	E3/E1	CELP-1	mITGB1	ActB	21.4696	19.5894	0.2716					0.2839	0.3162		0.4135	0.514		0.149	0.1868
	TRUE	F3/F1	CELP-2	mITGB1	ActB	21.4814	19.5383	0.2601														Mann Whitney test
	TRUE	G3/G1	CELP-3	mITGB1	ActB	21.4723	19.528	0.2598				stDEV	0.0180431	0.0267534	stDEV	0.0214229	0.0259759	stDEV	0.00746949	0.0240434		P value	0.2
	TRUE	H3/H1	CELP-4	mITGB1	ActB	21.4785	19.8175	0.3162				Ave	0.2961	0.276925	Ave	0.435425	0.4756	Ave	0.1543	0.1517		Exact or approximate P value?	Exact
	TRUE	A4/A1	CELN-1	mITGA3	ActB	22.0744	20.8876	0.4393				rel DEV	0.0609358	0.0903525	rel DEV	0.0492001	0.0596564	rel DEV	0.0484089	0.155823		P value summary	ns
	TRUE	B4/B1	CELN-2	mITGA3	ActB	22.016	20.7832	0.4255				rel Ave	1	0.935241	rel Ave	1	1.09227	rel Ave	1	0.98315		Significantly different (P < 0.05)?	No
	TRUE	C4/C1	CELN-3	mITGA3	ActB	22.0126	20.9029	0.4634														One- or two-tailed P value?	Two-tailed
	TRUE	D4/D1	CELN-4	mITGA3	ActB	22.0649	20.7907	0.4135					rel									Sum of ranks in column A,B	23 , 13
	TRUE	E4/E1	CELP-1	mITGA3	ActB	20.7124	19.5894	0.4592					1.02398	0.917258		1.0089	1.0546		1.01879	0.930006		Mann-Whitney U	3
	TRUE	F4/F1	CELP-2	mITGA3	ActB	20.6579	19.5383	0.4602					0.942587	0.878419		0.977206	1.0569		0.95593	0.856773
	TRUE	G4/G1	CELP-3	mITGA3	ActB	20.6205	19.528	0.469					1.07464	0.877406		1.06425	1.07711		1.05962	0.935191		Difference between medians
	TRUE	H4/H1	CELP-4	mITGA3	ActB	20.7777	19.8175	0.514					0.958798	1.06788		0.949647	1.18046		0.965651	1.21063		Median of column A	0.9914, n=4
	TRUE	A5/A1	CELN-1	mITGA6	ActB	23.557	20.8876	0.1572														Median of column B	0.8978, n=4
	TRUE	B5/B1	CELN-2	mITGA6	ActB	23.5445	20.7832	0.1475														Difference: Actual	-0.09355
	TRUE	C5/C1	CELN-3	mITGA6	ActB	23.5158	20.9029	0.1635														Difference: Hodges-Lehmann	-0.07278
	TRUE	D5/D1	CELN-4	mITGA6	ActB	23.5376	20.7907	0.149
	TRUE	E5/E1	CELP-1	mITGA6	ActB	22.3902	19.5894	0.1435
	TRUE	F5/F1	CELP-2	mITGA6	ActB	22.4577	19.5383	0.1322
	TRUE	G5/G1	CELP-3	mITGA6	ActB	22.321	19.528	0.1443														Table Analyzed	ITGA3
	TRUE	H5/H1	CELP-4	mITGA6	ActB	22.2383	19.8175	0.1868
																						Column B	Lu+ BC
	Note																					vs.	vs.
	CELN:Lu- BC; CELP:Lu+BC																					Column A	Lu- BC
																						Mann Whitney test
																						P value	0.1143
																						Exact or approximate P value?	Exact
																						P value summary	ns
																						Significantly different (P < 0.05)?	No
																						One- or two-tailed P value?	Two-tailed
																						Sum of ranks in column A,B	12 , 24
																						Mann-Whitney U	2
																						Difference between medians
																						Median of column A	0.9931, n=4
																						Median of column B	1.067, n=4
																						Difference: Actual	0.07395
																						Difference: Hodges-Lehmann	0.0898
																						Table Analyzed	ITGA6
																						Column B	Lu+BC
																						vs.	vs.
																						Column A	Lu-BC
																						Mann Whitney test
																						P value	0.3429
																						Exact or approximate P value?	Exact
																						P value summary	ns
																						Significantly different (P < 0.05)?	No
																						One- or two-tailed P value?	Two-tailed
																						Sum of ranks in column A,B	22 , 14
																						Mann-Whitney U	4
																						Difference between medians
																						Median of column A	0.9922, n=4
																						Median of column B	0.9326, n=4
																						Difference: Actual	-0.05962
																						Difference: Hodges-Lehmann	-0.05962
