# Supplementary material for: Differential expression of Lutheran/BCAM regulates biliary tissue remodeling in ductular reaction during liver regeneration
Source: eLife journal article supplement (doi:10.7554/elife.36572), 2018-07-30
Supplement: supp [file elife-36572-supp-v1.zip › elife_poa_e36572_Figure_5_figure_supplement_3_source_data_1.xlsx]

## Sheet: Figure 5-supplement 3
	Numerical Data (real-time RT-PCR)											Summary of expression analyses
	Experiment: 180616 Active filters: FAM (483-533), HEX / Yellow555 (523-568)
	Chart	Pairing	Sample Name	Targets	References	Mean Cp	Mean Cp	Target/Ref	Normalized	Status
	TRUE	A6/A2	CELN-ABc1	mLu	ActB	0	20.9189	0					Lu－ BC (control)	Lu－ BC (α-Itgb1 neutralizing AB)	Lu+ BC
	TRUE	B6/B2	CELN-ABc2	mLu	ActB	0	20.8214	0					0	0	0.000799
	TRUE	C6/C2	CELN-ABc3	mLu	ActB	0	20.7805	0					0	0	0.000927
	TRUE	D6/D2	CELN-ABc4	mLu	ActB	0	20.7969	0					0	0	0.000666
	TRUE	E6/E2	CELN-ABs1	mLu	ActB	0	20.8316	0					0	0	0.000308
	TRUE	F6/F2	CELN-ABs2	mLu	ActB	0	20.8266	0
	TRUE	G6/G2	CELN-ABs3	mLu	ActB	0	20.8838	0				stDEV	0	0	0.000266865
	TRUE	H6/H2	CELN-ABs4	mLu	ActB	0	20.1707	0				Ave	0	0	0.000675
	TRUE	A4/A1	CELP-1	mLu_FR4q	ActB	31.9296	21.6395	0.000799				rel DEV			0.395355
	TRUE	B4/B1	CELP-2	mLu_FR4q	ActB	30.8226	20.7477	0.000927				rel Ave			1
	TRUE	C4/C1	CELP-3	mLu_FR4q	ActB	31.79	21.2387	0.000666
	TRUE	D4/D1	CELP-4	mLu_FR4q	ActB	32.7138	21.0512	0.000308				rel
													0	0	1.1837
	Note												0	0	1.37333
	CELN:Lu- BC; CELP:Lu+BC												0	0	0.986667
													0	0	0.456296
