# Supplementary material for: Differential expression of Lutheran/BCAM regulates biliary tissue remodeling in ductular reaction during liver regeneration
Source: eLife journal article supplement (doi:10.7554/elife.36572), 2018-07-30
Supplement: supp [file elife-36572-supp-v1.zip › elife_poa_e36572_Figure_5_figure_supplement_4_source_data_1.xlsx]

## Sheet: Sheet1
Lu- BC with cont AB					Lu- BC with ITGB1 neutralizing AB				100μm＝49.7 pixel			Control	(count)				α-Itgb1 (neutralizing)	(count)
Sample#	Count#	Lumen diameter	pix→μm		Sample#	Count#	Lumen diameter	pix→μm			Sample#	Aggregation (0 μm Lumen)	1 - 10 μm Lumen	> 10 μm Lumen		Sample#	Aggregation (0 μm Lumen)	1 - 10 μm Lumen	> 10 μm Lumen
1	1	20.6	41.4487		1	1	0	0			1	3	0	9		1	12	0	2
	2	0	0			2	0	0			2	8	1	7		2	12	1	1
	3	5.2	10.4628			3	0	0			3	3	4	4		3	13	0	0
	4	14.9	29.9799			4	0	0			4	3	3	4		4	9	2	1
	5	0	0			5	0	0
	6	12.4	24.9497			6	0	0				Control	(%)				α-Itgb1 (neutralizing)	(%)
	7	0	0			7	0	0			Sample#	Aggregation (0 μm Lumen)	1 - 10 μm Lumen	> 10 μm Lumen		Sample#	Aggregation (0 μm Lumen)	1 - 10 μm Lumen	> 10 μm Lumen
	8	19.3	38.833			8	6.9	13.8833			1	25	0	75		1	85.7143	0	14.2857
	9	18.2	36.6197			9	0	0			2	50	6.25	43.75		2	85.7143	7.14286	7.14286
	10	5.6	11.2676			10	14.8	29.7787			3	27.2727	36.3636	36.3636		3	100	0	0
	11	19.7	39.6378			11	0	0			4	30	30	40		4	75	16.6667	8.33333
	12	6.6	13.2797			12	0	0
						13	0	0			average%	33.0682	18.1534	48.7784			86.6071	5.95238	7.44048
						14	0	0			StDEV	11.4715	17.7312	17.7393			10.2581	7.89673	5.86242
Sample#	Count#	Lumen diameter	pix→μm		Sample#	Count#	Lumen diameter	pix→μm		Lu- BC		Cell aggregate	1 - 10 μm Lumen	> 10 μm Lumen		ttest	Cell aggregate	1 - 10 μm Lumen	> 10 μm Lumen
2	1	10.4	20.9256		2	1	0	0			Control	33.0682	18.1534	48.7784			0.000437516	0.25541	0.00444587
	2	0	0			2	0	0			α-Itgb1 (neutralizing)	86.6071	5.95238	7.44048
	3	20.8	41.8511			3	0	0
	4	0	0			4	0	0
	5	0	0			5	0	0
	6	27.8	55.9356			6	0	0
	7	14	28.169			7	4.4	8.85312
	8	0	0			8	6.2	12.4748
	9	13.1	26.3581			9	0	0
	10	6.6	13.2797			10	0	0
	11	0	0			11	0	0
	12	4.3	8.65191			12	0	0
	13	22.3	44.8692			13	0	0
	14	0	0			14	0	0
	15	0	0
	16	0	0
Sample#	Count#	Lumen diameter	pix→μm		Sample#	Count#	Lumen diameter	pix→μm
3	1	20.8	41.8511		3	1	0	0
	2	4.9	9.85915			2	0	0
	3	2	4.02414			3	0	0
	4	24	48.2897			4	0	0
	5	0	0			5	0	0
	6	0	0			6	0	0
	7	3.6	7.24346			7	0	0
	8	19.1	38.4306			8	0	0
	9	5.1	10.2616			9	0	0
	10	0	0			10	0	0
	11	3.6	7.24346			11	0	0
						12	0	0
						13	0	0
Sample#	Count#	Lumen diameter	pix→μm		Sample#	Count#	Lumen diameter	pix→μm
4	1	12.5	25.1509		4	1	0	0
	2	5	10.0604			2	0	0
	3	4.8	9.65795			3	0	0
	4	3.8	7.64588			4	0	0
	5	0	0			5	0	0
	6	17.4	35.0101			6	0	0
	7	13	26.1569			7	0	0
	8	0	0			8	3.1	6.23742
	9	0	0			9	4.6	9.25553
	10	4.4	8.85312			10	8.8	17.7062
						11	0	0
						12	0	0
