# Supplementary material for: Differential expression of Lutheran/BCAM regulates biliary tissue remodeling in ductular reaction during liver regeneration
Source: eLife journal article supplement (doi:10.7554/elife.36572), 2018-07-30
Supplement: supp [file elife-36572-supp-v1.zip › elife_poa_e36572_Figure_5_source_data_1.xlsx]

## Sheet: Figure 5B
Numerical data for Figure 5B																				Mann-Whitney test for Figure 5B
Experiment: 171024_Fn_Lama5 Active filters: FAM (483-533), HEX / Yellow555 (523-568)													abs.			rel.				Table Analyzed	mLama5
Chart	Pairing	Sample Name	Targets	References	Mean Cp	Mean Cp	Target/Ref	Normalized	Status	CDE EpCAM+	DDC EpCAM+		CDE EpCAM+	DDC EpCAM+		CDE EpCAM+	DDC EpCAM+
TRUE	E1/A1	1	mLama5	ActB	26.8264	22.5898	0.053		ave	0.0674	0.173425		0.053	0.1763		0.78635	2.61573			Column B	DDC Ep+
TRUE	E2/A2	2	mLama5	ActB	26.7269	22.0589	0.0393		stdev	0.0261836	0.130974		0.0393	0.0346		0.583086	0.513353			vs.	vs.
TRUE	E3/A3	3	mLama5	ActB	29.1868	25.8278	0.0975						0.0975	0.3485		1.44659	5.17062			Column A	CDE Ep+
TRUE	E4/A4	4	mLama5	ActB	27.6953	24.0473	0.0798		Relative	CDE Ep+	DDC Ep+		0.0798	0.1343		1.18398	1.99258
TRUE	E5/A5	5	mLama5	ActB	27.0383	24.5347	0.1763		ave	1	2.57307									Mann Whitney test
TRUE	E6/A6	6	mLama5	ActB	25.2301	20.3754	0.0346		stdev	0.38848	1.94324									P value	0.3429
TRUE	E7/A7	7	mLama5	ActB	35.7017	34.181	0.3485													Exact or approximate P value?	Exact
TRUE	E8/A8	8	mLama5	ActB	35.4884	32.592	0.1343													P value summary	ns
																				Significantly different (P < 0.05)?	No
																				One- or two-tailed P value?	Two-tailed
																				Sum of ranks in column A,B	14 , 22
																				Mann-Whitney U	4
																				Difference between medians
																				Median of column A	0.0664, n=4
																				Median of column B	0.1553, n=4
																				Difference: Actual	0.0889
																				Difference: Hodges-Lehmann	0.08815

## Sheet: Figure 5C
Numerical data for Figure 5C																	Mann-Whitney test for Figure 5C
																	Table Analyzed	CD29
	d0 - d1	Well Ave			d0 - d1	Well Ave				Relative moving distance				Relative stDev
Lu- BC	2.2	2.90833		Lu- BC + α-Itgb1	4.08333	6.3				Lu- BC + Hamster IgG	Lu- BC + α-Itgb1			Lu- BC + Hamster IgG	Lu- BC + α-Itgb1		Column B	α-Itgb1
	9.18333				8.81667				d0 - d1	1	3.20036			0.681033	1.14204		vs.	vs.
	0.166667				5.43333												Column A	Cont.
	0.0833333				6.86667
	8.95	2.60417			13.7167	6.45833			Absolute			Relative					Mann Whitney test
	-0.366667				-4.13333				Cont	Lu- BC + α-Itgb1		Cont	Lu- BC + α-Itgb1				P value	0.0571
	2.16667				-1.75				2.90833	6.3		1.66986	3.61722				Exact or approximate P value?	Exact
	-0.333333				18				2.60417	6.45833		1.49522	3.70813				P value summary	ns
	-2.3	0.895833			5.81667	2.61667			0.895833	2.61667		0.514354	1.50239				Significantly different (P < 0.05)?	No
	3.2				0.233333				0.558333	6.92083		0.320574	3.97368				One- or two-tailed P value?	Two-tailed
	1.51667				0.683333												Sum of ranks in column A,B	11 , 25
	1.16667				3.73333												Mann-Whitney U	1
	0.616667	0.558333			2.43333	6.92083
	0.0833333				7.48333												Difference between medians
	0.566667				11.4												Median of column A	1.005, n=4
	0.966667				6.36667												Median of column B	3.663, n=4
																	Difference: Actual	2.658
																	Difference: Hodges-Lehmann	2.258

## Sheet: Figure 5D
Lu+ BC with contAB					Lu+ BC with CD29actAB				100μm＝49.7 pixel			Control	(count)				α-Itgb1 (activating)	(count)
Sample#	Count#	Lumen diameter	pix→μm		Sample#	Count#	Lumen diameter	pix→μm			Sample#	Cell aggregate	1 - 10 μm Lumen	> 10 μm Lumen		Sample#	Cell aggregate	1 - 10 μm Lumen	> 10 μm Lumen
1	1	0	0		1	1	0	0			1	12	1	0		1	8	1	5
	2	0	0			2	6.5	13.0785			2	16	0	0		2	6	1	6
	3	0	0			3	0	0			3	16	2	0		3	7	1	7
	4	0	0			4	7.5	15.0905			4	17	1	0		4	3	1	8
	5	0	0			5	0	0
	6	0	0			6	3.3	6.63984				Control	(%)				α-Itgb1 (activating)	(%)
	7	0	0			7	12.8	25.7545			Sample#	Cell aggregate	1 - 10 μm Lumen	> 10 μm Lumen		Sample#	Cell aggregate	1 - 10 μm Lumen	> 10 μm Lumen
	8	0	0			8	22.2	44.668			1	92.3077	7.69231	0		1	57.1429	7.14286	35.7143
	9	2.5	5.03018			9	0	0			2	100	0	0		2	46.1538	7.69231	46.1538
	10	0	0			10	0	0			3	88.8889	11.1111	0		3	46.6667	6.66667	46.6667
	11	0	0			11	24.3	48.8934			4	94.4444	5.55556	0		4	25	8.33333	66.6667
	12	0	0			12	0	0
	13	0	0			13	0	0			average%	93.9103	6.08974	0			43.7408	7.45879	48.8004
						14	0	0			StDEV	4.66021	4.66021	0			13.4811	0.718013	12.9358
Sample#	Count#	Lumen diameter	pix→μm		Sample#	Count#	Lumen diameter	pix→μm		Lu+ BC		Cell aggregate	1 - 10 μm Lumen	> 10 μm Lumen		ttest	Cell aggregate	1 - 10 μm Lumen	> 10 μm Lumen
2	1	0	0		2	1	18.1	36.4185			Control	93.9103	6.08974	0			0.00041233	0.582583	0.00028117
	2	0	0			2	29.5	59.3561			α-Itgb1 (activating)	43.7408	7.45879	48.8004
	3	0	0			3	0	0
	4	0	0			4	7.8	15.6942
	5	0	0			5	2.7	5.4326
	6	0	0			6	0	0
	7	0	0			7	26.8	53.9235
	8	0	0			8	0	0
	9	0	0			9	0	0
	10	0	0			10	0	0
	11	0	0			11	0	0
	12	0	0			12	24.5	49.2958
	13	0	0			13	19.1	38.4306
	14	0	0
	15	0	0
	16	0	0
Sample#	Count#	Lumen diameter	pix→μm		Sample#	Count#	Lumen diameter	pix→μm
3	1	0	0		3	1	16.2	32.5956
	2	0	0			2	0	0
	3	0	0			3	5.8	11.67
	4	0	0			4	0	0
	5	0	0			5	17	34.2052
	6	0	0			6	0	0
	7	0	0			7	5.3	10.664
	8	0	0			8	3.3	6.63984
	9	0	0			9	0	0
	10	0	0			10	0	0
	11	0	0			11	19.9	40.0402
	12	0	0			12	0	0
	13	2.6	5.23139			13	23.4	47.0825
	14	0	0			14	0	0
	15	0	0			15	16.7	33.6016
	16	1	2.01207
	17	0	0
	18	0	0
Sample#	Count#	Lumen diameter	pix→μm		Sample#	Count#	Lumen diameter	pix→μm
4	1	0	0		4	1	0	0
	2	0	0			2	9	18.1087
	3	0	0			3	13.1	26.3581
	4	0	0			4	17.1	34.4064
	5	0	0			5	18.6	37.4245
	6	0	0			6	3.2	6.43863
	7	0	0			7	11.7	23.5412
	8	0	0			8	0	0
	9	0	0			9	16	32.1932
	10	0	0			10	24.4	49.0946
	11	4.1	8.2495			11	0	0
	12	0	0			12	12.2	24.5473
	13	0	0
	14	0	0
	15	0	0
	16	0	0
	17	0	0
	18	0	0
