# Supplementary material for: Differential expression of Lutheran/BCAM regulates biliary tissue remodeling in ductular reaction during liver regeneration
Source: eLife journal article supplement (doi:10.7554/elife.36572), 2018-07-30
Supplement: supp [file elife-36572-supp-v1.zip › elife_poa_e36572_Figure_6_figure_supplement_1.pdf]

# Figure 6-figure supplement 1

**Primer 1** *Bcam\_F1g*: 5' GACAGCAGGAAGGTGAGCC 3'

**Primer 2** *Bcam\_R1g*: 5' AGGGCAGTGGGAGGTCTTG 3'

## Wild type mouse amplicon

AGGGCAGTGGGAGGTCTTGGCCCTGCGCCCAGCTTGGGGATGGGGTGGGCGTGGTCAGGGG  
CGTGGTCAGGGGCCTGGCCTCCGCTGCCAGCTTCAGGGCGGCGGAGAGCCTCGCCCGGGCT  
CAGTCACTGCCGCCACTGCAGGGAACATGG**AACCCCTGACGCCGCGCAGGG**CTGCTGT  
GGCTCACCTTCCTGCTGTC (201 bp)

guide RNA

PAM  
sequence

Initiation Deleted sequence in knockout mouse

## Knockout mouse amplicon (11bp deletion)

AGGGCAGTGGGAGGTCTTGGCCCTGCGCCCAGCTTGGGGATGGGGTGGGCGTGGTCAGGGG  
CGTGGTCAGGGGCCTGGCCTCCGCTGCCAGCTTCAGGGCGGCGGAGAGCCTCGCCCGGGCT  
CAGTCACTGCCGCCACTGCAGGGAACATGGAAACCCCTGACGCTGCTGTGGCTCACCTTCCTG  
CTGTC (190 bp)
