# Supplementary material for: Differential expression of Lutheran/BCAM regulates biliary tissue remodeling in ductular reaction during liver regeneration
Source: eLife journal article supplement (doi:10.7554/elife.36572), 2018-07-30
Supplement: supp [file elife-36572-supp-v1.zip › elife_poa_e36572_Figure_6_source_data_1.xlsx]

## Sheet: Figure 6B
Numerical data for Figure 6B					Mann-Whitney test for Figure 6B
	CDE WT	CDE Bcam KO			Table Analyzed	Ki67
A1	4.44288	5.55556
A2	3.41818	2.80374			Column B	CDE Bcam KO
A3	4.60277	3.7234			vs.	vs.
B1	4.56853	5.16432			Column A	CDE
B2	5.21597	5.80913
B3	2.86378	7.04225			Mann Whitney test
C1	3.43102	1.75439			P value	0.3429
C2	3.71429	6.93642			Exact or approximate P value?	Exact
C3	2.94464	1.92308			P value summary	ns
D1	3.083	5.04587			Significantly different (P < 0.05)?	No
D2	2.485	3.44828			One- or two-tailed P value?	Two-tailed
D3	2.6225	5.59006			Sum of ranks in column A,B	14 , 22
					Mann-Whitney U	4
subAverage
A	4.15461	4.02757			Difference between medians
B	4.21609	6.00523			Median of column A	3.759, n=4
C	3.36332	3.53796			Median of column B	4.361, n=4
D	2.73017	4.69474			Difference: Actual	0.6022
					Difference: Hodges-Lehmann	0.736
Average	CDE WT	CDE Bcam KO
	3.61605	4.56637
stDev	0.706814	1.07001

## Sheet: Figure 6D
CDE WT									DDC WT									Summary of 4 groups						Ordinaly one-way ANOVA
Animal	Slide No	Max Dist(PV-CK19)	Long Diameter	Short Diameter	r (mean)	[D]-[G]	Average		Animal	Slide No	Max Dist(PV-CK19)	Long Diameter	Short Diameter	r (mean)	[D]-[G]	Average								Number of families	1
#1	1	236	45.8	24.1	17.475	218.525	197.352		#1	1	56.4	28.3	13.8	10.525	45.875	78.2917			CDE WT	CDE Bcam KO	DDC WT	DDC Bcam KO		Number of comparisons per family	6
	1	243.2	52.8	26.5	19.825	223.375				2	79.9	48.4	25.4	18.45	61.45				197.352	43.2857	78.2917	82.1083		Alpha	0.05
	2	246.3	28	20.3	12.075	234.225				3	106.8	40.6	23.1	15.925	90.875				147.873	24.3636	74.9188	75.2143
	2	190.3	17.7	15.4	8.275	182.025				3	125.7	31.3	18.3	12.4	113.3				152.756	20.9719	84.9656	90.4075		Tukey's multiple comparisons test	Mean Diff.	95.00% CI of diff.	Significant?	Summary	Adjusted P Value
	3	206.9	71.7	35.6	26.825	180.075				4	84.1	57	23.8	20.2	63.9				168.83	45.7864	68.74	57.3531
	5	240.7	26.5	20.6	11.775	228.925					141.5	58.7	19.9	19.65	121.85				148.912	31.2139	83.2208	59.4577		CDE WT vs. CDE Bcam KO	1.666	1.337 to 1.996	Yes	****	<0.0001	A-B
	6	113.9	15.7	10.5	6.55	107.35				5	56.3	29.5	17	11.625	44.675									CDE WT vs. DDC WT	1.091	0.7615 to 1.42	Yes	****	<0.0001	A-C
	7	246.3	24.9	18	10.725	235.575					81.3	33.1	33.1	16.55	64.75			ave	163.145	33.1243	78.0274	72.9082		CDE WT vs. DDC Bcam KO	1.156	0.8271 to 1.486	Yes	****	<0.0001	A-D
	8	174	40.9	23.6	16.125	157.875				6	146.8	118.3	77.1	48.85	97.95									CDE Bcam KO vs. DDC WT	-0.5755	-0.9049 to -0.2461	Yes	***	0.0007	B-C
	9	237.1	109.2	16.9	31.525	205.575												Rel.						CDE Bcam KO vs. DDC Bcam KO	-0.5099	-0.8393 to -0.1805	Yes	**	0.0021	B-D
									#2	1	66.5	55.9	23.7	19.9	46.6	74.9188			CDE WT	CDE Bcam KO	DDC WT	DDC Bcam KO		DDC WT vs. DDC Bcam KO	0.06561	-0.2638 to 0.395	No	ns	0.9396	C-D
#2	1	123.3	39.7	10.7	12.6	110.7	147.873			2	91.8	43.7	16.7	15.1	76.7				2.52927	0.55475	1.00339	1.0523
	1	76.5	13.8	7	5.2	71.3					118.4	66.1	19.6	21.425	96.975				1.89514	0.312245	0.96016	0.963947
	2	245.6	44.8	18.1	15.725	229.875					89.1	52.8	35.3	22.025	67.075				1.95773	0.268776	1.08892	1.15866		Test details	Mean 1	Mean 2	Mean Diff.	SE of diff.	n1	n2	q	DF
	3	152.9	31.7	14	11.425	141.475				3	45.8	22.5	17.2	9.925	35.875				2.16373	0.586799	0.880973	0.735039
	4	218.7	52.2	13.9	16.525	202.175					173.3	147.5	25.1	43.15	130.15				1.90846	0.400038	1.06656	0.762011		CDE WT vs. CDE Bcam KO	2.091	0.4245	1.666	0.1151	5	5	20.47	16
	5	190.8	39.7	18.1	14.45	176.35				4	89.1	41.6	37.5	19.775	69.325									CDE WT vs. DDC WT	2.091	1	1.091	0.1151	5	5	13.4	16
	5	108.6	25	14.3	9.825	98.775				8	116.2	140.1	18.1	39.55	76.65			ave	2.09087	0.424521	1	0.934392		CDE WT vs. DDC Bcam KO	2.091	0.9344	1.156	0.1151	5	5	14.21	16
	6	185.1	24.3	11	8.825	176.275												stdev	0.267776	0.142088	0.0838201	0.183392		CDE Bcam KO vs. DDC WT	0.4245	1	-0.5755	0.1151	5	5	7.069	16
	6	139.6	22.1	13	8.775	130.825																		CDE Bcam KO vs. DDC Bcam KO	0.4245	0.9344	-0.5099	0.1151	5	5	6.263	16
	7	150	25.6	10.5	9.025	140.975			#3	1	157.3	52.9	28.5	20.35	136.95	84.9656								DDC WT vs. DDC Bcam KO	1	0.9344	0.06561	0.1151	5	5	0.8059	16
											147	70.2	27.6	24.45	122.55
#3	1	169.3	20.3	11.2	7.875	161.425	152.756			2	65.7	30.2	19.9	12.525	53.175
	1	123.5	16.4	5.2	5.4	118.1				3	53.4	41	20.7	15.425	37.975
	2	227.9	53.7	13.4	16.775	211.125				4	81.7	78.6	23.1	25.425	56.275									Summary of one-way ANOVA
	2	121.1	28.1	14.1	10.55	110.55				6	66.4	48.1	32.1	20.05	46.35									Table Analyzed	DR
	3	156.4	6.1	2.9	2.25	154.15				7	97.8	69.3	41.7	27.75	70.05									Data sets analyzed	A : CDE WT	B : CDE Bcam KO	C : DDC WT	D : DDC Bcam KO
	4	176.4	58.4	34.5	23.225	153.175					177.4	59.4	24.6	21	156.4
	4	168	18.5	11.4	7.475	160.525																		ANOVA summary
									#4	1	131.3	139.4	65	51.1	80.2	68.74								F	74.18
#4	1	226.3	53.1	43	24.025	202.275	168.83			2	68.9	68.5	48.6	29.275	39.625									P value	<0.0001
	1	122.4	88.3	45.9	33.55	88.85					108.1	120.8	17.4	34.55	73.55									P value summary	****
	2	247	44.4	21.7	16.525	230.475				4	126.4	134.2	13.7	36.975	89.425									Significant diff. among means (P < 0.05)?	Yes
		216.2	92.6	45.4	34.5	181.7					75.5	34.1	24.3	14.6	60.9									R square	0.9329
	4	287.3	123.1	25.4	37.125	250.175
	5	152	32.2	15.6	11.95	140.05			#5	1	108.8	50.4	21.7	18.025	90.775	83.2208								Brown-Forsythe test
		107.3	16.8	13.5	7.575	99.725				2	70.7	56.5	29.7	21.55	49.15									F (DFn, DFd)	0.671 (3, 16)
	6	185	35.2	22.1	14.325	170.675				4	138.3	74.7	39.9	28.65	109.65									P value	0.5821
	7	161.1	50	44.4	23.6	137.5					163	201.7	27	57.175	105.825									P value summary	ns
	8	204.4	37.2	32.9	17.525	186.875				7	99.5	42.5	37.7	20.05	79.45									Are SDs significantly different (P < 0.05)?	No
											80.7	38.7	26.2	16.225	64.475
#5	1	213.7	62.2	18.9	20.275	193.425	148.912																	Bartlett's test
	2	108.9	41.8	15.2	14.25	94.65			DDC Bcam KO															Bartlett's statistic (corrected)	4.564
		158	58.7	26.4	21.275	136.725			Animal	Slide No	Max Dist(PV-CK19)	Long Diameter	Short Diameter	r (mean)	[D]-[G]	Average								P value	0.2066
		153.1	24.6	23.1	11.925	141.175			#1	x10-1	141.7	43.3	24.5	16.95	124.75	82.1083								P value summary	ns
	3	186.4	47.4	13.4	15.2	171.2				x10-1	88.4	49.4	21	17.6	70.8									Are SDs significantly different (P < 0.05)?	No
	4	173.3	36.6	17.1	13.425	159.875				x10-2	85.3	89.5	21.5	27.75	57.55
	5	155.5	52.4	18.3	17.675	137.825				x10-3	115.2	89	17.6	26.65	88.55									ANOVA table	SS	DF	MS	F (DFn, DFd)	P value
	6	171.2	42.3	16.8	14.775	156.425				x10-4	110.7	105.2	21.2	31.6	79.1									Treatment (between columns)	7.374	3	2.458	F (3, 16) = 74.18	P<0.0001
										x10-5	36.5	24.1	14.4	9.625	26.875									Residual (within columns)	0.5302	16	0.03314
CDE Bcam KO										x10-5	63.2	67.4	24.4	22.95	40.25									Total	7.905	19
Animal	Slide No	Max Dist(PV-CK19)	Long Diameter	Short Diameter	r (mean)	[D]-[G]	Average			x10-5	97.1	27.3	11.5	9.7	87.4
#1	x10-1	30.5	31.4	12.3	10.925	19.575	43.2857			x10-6	158.8	134	35.2	42.3	116.5									Data summary
	x10-1	18.6	13.3	8.7	5.5	13.1				x10-7	91.2	33.5	11.1	11.15	80.05									Number of treatments (columns)	4
	x10-1	115.1	87.6	16.1	25.925	89.175				x10-7	100.8	64.2	12.5	19.175	81.625									Number of values (total)	20
	x10-2	87.8	64.3	15.2	19.875	67.925				x10-7	163.6	61.2	19.7	20.225	143.375
	x10-3	82	57.2	17.7	18.725	63.275				x10-8	84.4	34.7	19.2	13.475	70.925
	x10-3	47.9	35.6	15.2	12.7	35.2				x10-9	87.7	41	16.5	14.375	73.325
	x10-4	21.6	27.7	14	10.425	11.175				x10-9	102.2	35.8	10.8	11.65	90.55
	x10-4	37.9	71.4	13.3	21.175	16.725
	x10-4	18.4	22.3	8.3	7.65	10.75			#2	x10-1	65.4	55.9	20.8	19.175	46.225	75.2143
	x10-5	102.8	69.2	17.3	21.625	81.175				x10-1	64.9	56.6	19.4	19	45.9
	x10-5	58.9	42.2	12.5	13.675	45.225				x10-1	96.5	53.2	18.8	18	78.5
	x10-6	87.1	51.7	11.6	15.825	71.275				x10-2	152.4	158.3	46.8	51.275	101.125
	x10-6	81.8	71.3	60.3	32.9	48.9				x10-2	71.6	30.2	15.1	11.325	60.275
	x10-6	46.1	42.6	11.7	13.575	32.525				x10-3	163.9	96.3	45.4	35.425	128.475
										x10-4	77.1	34.8	23.4	14.55	62.55
#2	x10-1	78	106.7	7.5	28.55	49.45	24.3636			x10-4	71.1	20.2	10.2	7.6	63.5
	x10-2	44.4	52.8	9.5	15.575	28.825				x10-5	188.2	99.6	30.7	32.575	155.625
	x10-2	58.2	57.8	8.8	16.65	41.55				x10-5	32.6	22.3	14.2	9.125	23.475
	x10-3	33.4	19.4	13.1	8.125	25.275				x10-6	120.2	92.7	69.2	40.475	79.725
	x10-3	48.2	19.3	10.1	7.35	40.85				x10-6	128.3	98.7	24.5	30.8	97.5
	x10-4	14.8	18.3	6.8	6.275	8.525				x10-7	55.8	31	16.4	11.85	43.95
	x10-4	19.2	12.7	9	5.425	13.775				x10-7	77.5	32.2	13.1	11.325	66.175
	x10-4	14.8	16.5	7.2	5.925	8.875
	x10-5	19.6	28.8	18.9	11.925	7.675			#3	x10-1	146.6	75.8	17.4	23.3	123.3	90.4075
	x10-5	37	46.3	11.5	14.45	22.55				x10-2	124	112	27.1	34.775	89.225
	x10-5	29.3	21.3	13.3	8.65	20.65				x10-3	56.3	15.2	12.5	6.925	49.375
										x10-3	53.1	25.4	9	8.6	44.5
#3	x10-1	13.8	16.7	7.9	6.15	7.65	20.9719			x10-4	69.9	48	24.7	18.175	51.725
	x10-1	18.7	23.6	10.3	8.475	10.225				x10-5	108.8	63	9.7	18.175	90.625
	x10-1	16.5	21.9	7.9	7.45	9.05				x10-6	143.1	66	34.5	25.125	117.975
	x10-2	20.4	24.9	20.2	11.275	9.125				x10-7	113.9	83.5	31.9	28.85	85.05
	x10-2	13.6	12.8	8.2	5.25	8.35				x10-8	126.9	66.1	35.1	25.3	101.6
	x10-3	41.7	55.1	14	17.275	24.425				x10-9	214.9	181.7	75.1	64.2	150.7
	x10-3	39.9	68.9	7.5	19.1	20.8
	x10-4	38.3	44.9	24.5	17.35	20.95			#4	x10-1	39.8	53.6	18	17.9	21.9	57.3531
	x10-4	79.1	41.3	24.6	16.475	62.625				x10-2	173.4	129.5	25.5	38.75	134.65
	x10-5	25.2	21.4	7.8	7.3	17.9				x10-2	25.3	28.5	20	12.125	13.175
	x10-5	85.3	81.2	26.1	26.825	58.475				x10-3	82.8	95.1	20.5	28.9	53.9
	x10-6	47.9	47	15.3	15.575	32.325				x10-3	61.9	64.4	25.2	22.4	39.5
	x10-6	17.8	17.5	8.1	6.4	11.4				x10-4	145.8	89.8	28.8	29.65	116.15
	x10-7	19.7	21.6	18.2	9.95	9.75				x10-5	130.6	111.3	48.7	40	90.6
	x10-7	18.5	27.5	17.3	11.2	7.3				x10-6	142	112.5	27.7	35.05	106.95
	x10-7	33.4	20.5	12.3	8.2	25.2				x10-6	34	23	16.1	9.775	24.225
										x10-7	96.3	112.9	31.1	36	60.3
#4	x10-1	164.5	203.5	43.5	61.75	102.75	45.7864			x10-7	52.1	26.2	12.5	9.675	42.425
	x10-2	55.8	63.7	22.7	21.6	34.2				x10-7	72.6	36.4	21.9	14.575	58.025
	x10-2	37.7	52.3	23.3	18.9	18.8				x10-8	63.2	25.7	14.6	10.075	53.125
	x10-3	80.2	38.8	17.7	14.125	66.075				x10-8	56	93.9	26.1	30	26
	x10-3	26.7	25.5	11	9.125	17.575				x10-9	59.7	62.4	20.3	20.675	39.025
	x10-3	46.4	28.2	8.3	9.125	37.275				x10-9	51.2	36.4	17.6	13.5	37.7
	x10-4	59.3	39.9	24.1	16	43.3
	x10-5	60.5	88.4	30.8	29.8	30.7			#5	x10-1	62	37.7	19	14.175	47.825	59.4577
	x10-6	96.1	46.8	17.9	16.175	79.925				x10-1	91.1	31.7	15.5	11.8	79.3
	x10-8	59.5	53.9	29.5	20.85	38.65				x10-2	107	55.8	29.9	21.425	85.575
	x10-9	49.2	37	22.2	14.8	34.4				x10-2	62.2	111.8	53.9	41.425	20.775
										x10-3	63.3	64.1	38.4	25.625	37.675
#5	x10-1	74.8	65.3	16.3	20.4	54.4	31.2139			x10-3	70.4	48	37.8	21.45	48.95
	x10-1	22	29.9	11	10.225	11.775				x10-4	72.8	73.2	42.1	28.825	43.975
	x10-2	53.1	81.1	24.5	26.4	26.7				x10-5	70.3	33.2	24	14.3	56
	x10-2	15.3	19.7	15.4	8.775	6.525				x10-5	68.8	39.6	22.4	15.5	53.3
	x10-3	54	29.1	20.1	12.3	41.7				x10-5	99	36.3	23.4	14.925	84.075
	x10-3	31.1	28.9	17.3	11.55	19.55				x10-6	81.3	68.2	26.6	23.7	57.6
	x10-5	68.8	33.9	18.2	13.025	55.775				x10-7	120.5	80.3	43	30.825	89.675
	x10-5	33.3	18.9	13.8	8.175	25.125				x10-8	90.7	54.7	35.2	22.475	68.225
	x10-5	23.6	22.8	8.6	7.85	15.75
	x10-5	51.4	24.7	10.9	8.9	42.5
	x10-5	37.8	57.6	29.6	21.8	16
	x10-6	25.6	29.9	7.2	9.275	16.325
	x10-7	41.8	40.4	19	14.85	26.95
	x10-8	78.5	44.7	30.6	18.825	59.675
	x10-8	80.3	54.8	26.3	20.275	60.025
	x10-9	54.2	59	13	18	36.2
	x10-9	47.5	61.6	15.4	19.25	28.25
	x10-10	39.6	55.2	28.7	20.975	18.625
