# Supplementary figures and images for: Differential expression of Lutheran/BCAM regulates biliary tissue remodeling in ductular reaction during liver regeneration
Source: eLife journal article supplement (doi:10.7554/elife.36572), 2018-07-30

Figure 2-figure supplement 2

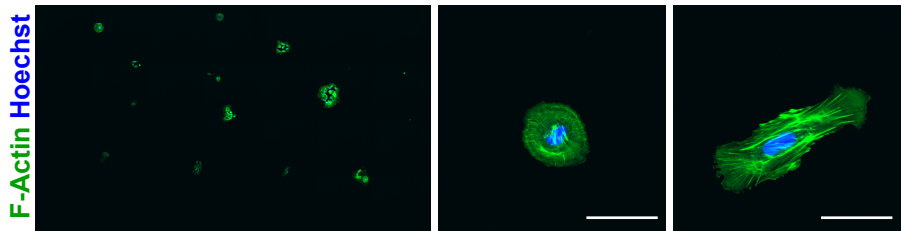

Supplement: supp [file elife-36572-supp-v1.zip]

# Figure 5-figure supplement 4

Lu<sup>+</sup> BC

Control

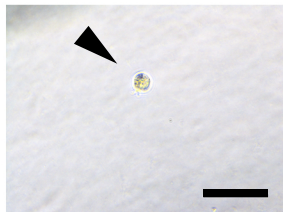

$\alpha$ -Itgb1 (activating)

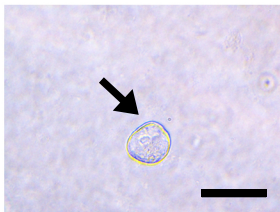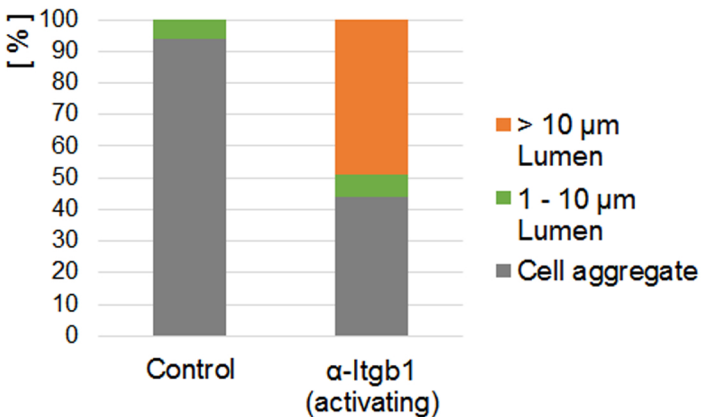

Supplement: supp [file elife-36572-supp-v1.zip]

Figure 2-figure supplement 1

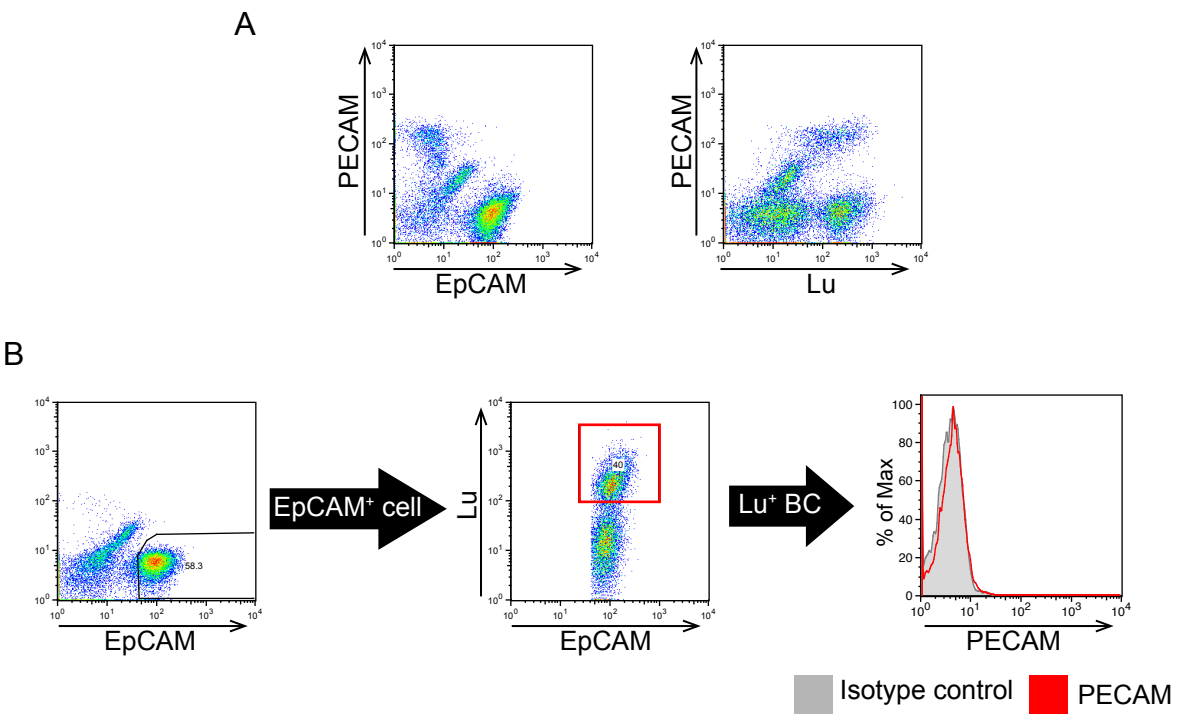

Supplement: supp [file elife-36572-supp-v1.zip]

Figure 5-figure supplement 3

*Bcam*

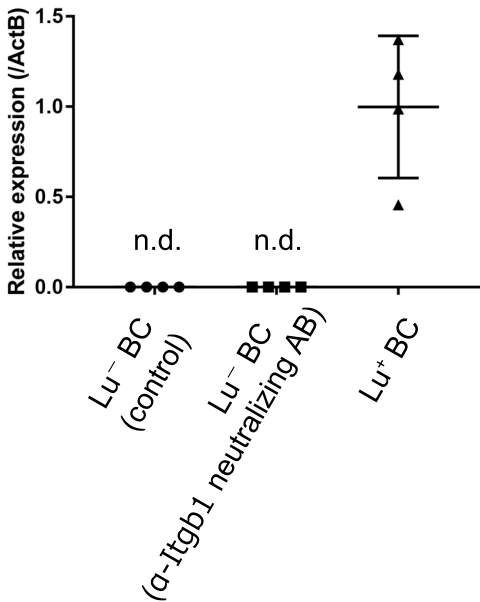

Supplement: supp [file elife-36572-supp-v1.zip]

Figure 5-figure supplement 2

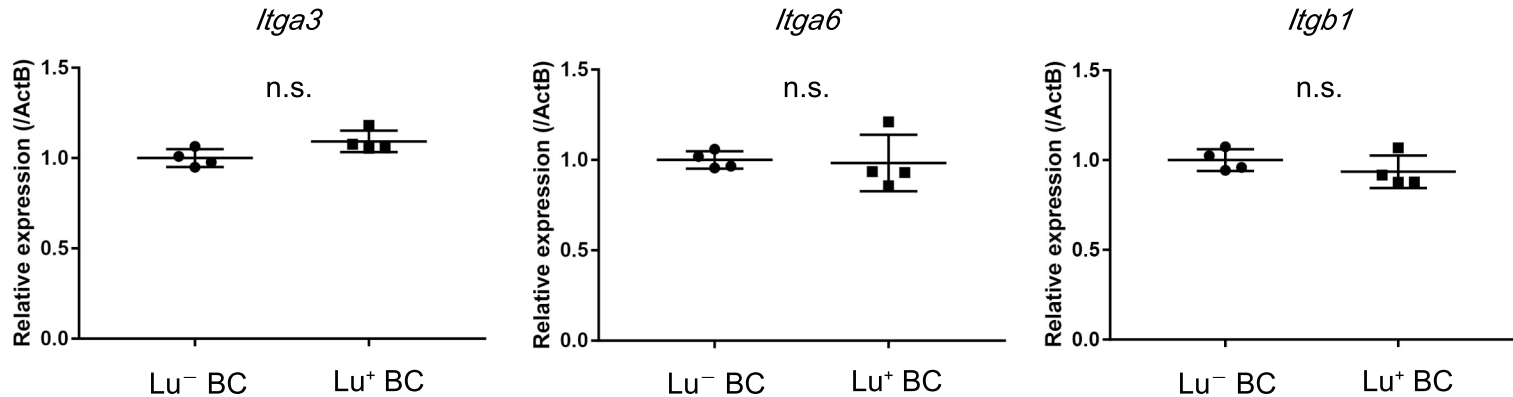

Supplement: supp [file elife-36572-supp-v1.zip]

# Figure 1-figure supplement 4

Ba/F3-mLu IRES GFP

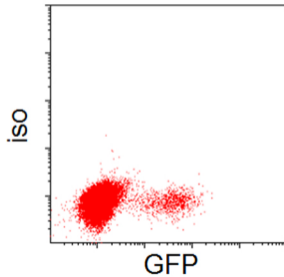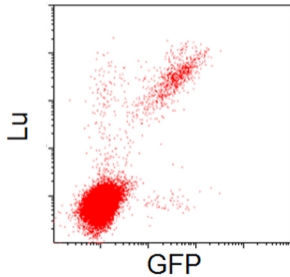

Supplement: supp [file elife-36572-supp-v1.zip › elife_poa_e36572_Figure_1_figure_supplement_4.pdf]

# Figure 1-figure supplement 1

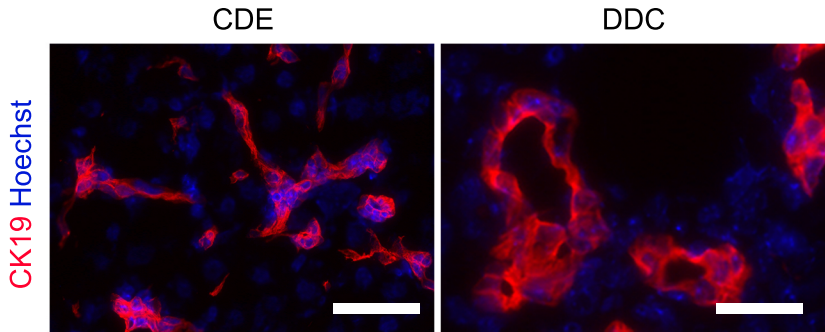

Scale bar: 50  $\mu$ m

Supplement: supp [file elife-36572-supp-v1.zip › elife_poa_e36572_Figure_1_figure_supplement_1.pdf]

Figure 1-figure supplement 2

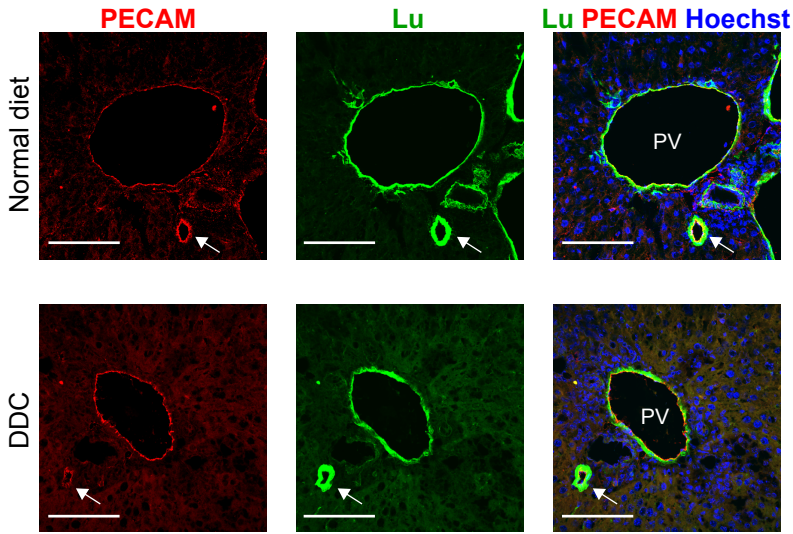

Supplement: supp [file elife-36572-supp-v1.zip › elife_poa_e36572_Figure_1_figure_supplement_2.pdf]

Figure 1-figure supplement 3

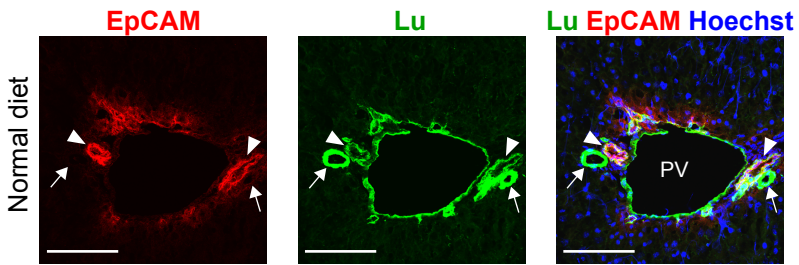

Supplement: supp [file elife-36572-supp-v1.zip › elife_poa_e36572_Figure_1_figure_supplement_3.pdf]
